# Supplementary material for: Taxogenomic assessment and genomic characterisation of Weissella cibaria strain 92 able to metabolise oligosaccharides derived from dietary fibres
Source: PubMed Central journal article supplement (PMC7125115; doi:10.1038/s41598-020-62610-x), 2020-04-03
Supplement: 41598_2020_62610_MOESM1_ESM.pdf [file 41598_2020_62610_MOESM1_ESM.pdf]

# Supplementary Information

## Taxogenomic assessment and genomic characterisation of *Weissella cibaria* strain 92 able to metabolise oligosaccharides derived from dietary fibres

Anna Månberger<sup>1,\*</sup>, Phebe Verbrugghe<sup>2</sup>, Elísabet Eik Guðmundsdóttir<sup>3</sup>, Sara Santesson<sup>1</sup>, Anne Nilsson<sup>2</sup>, Guðmundur Óli Hreggviðsson<sup>3,4</sup>, Javier A. Linares-Pastén<sup>1,\*</sup> and Eva Nordberg Karlsson<sup>1,\*</sup>

<sup>1</sup> Biotechnology, Department of Chemistry, Lund University, PO Box 124, SE-221 00 Lund, Sweden

<sup>2</sup> Food Technology, Engineering and Nutrition, Lund University, PO Box 124, SE-221 00, Lund, Sweden

<sup>3</sup> Mátis, Vinlandsleid 12, IS-113, Reykjavík, Iceland

<sup>4</sup> Faculty of Life and Environmental Sciences, University of Iceland, Askja, IS-101, Reykjavík, Iceland

\* Corresponding author, e-mail: [anna.manberger@biotek.lu.se](mailto:anna.manberger@biotek.lu.se), [javier.linares\\_pasten@biotek.lu.se](mailto:javier.linares_pasten@biotek.lu.se), [eva.nordberg\\_karlsson@biotek.lu.se](mailto:eva.nordberg_karlsson@biotek.lu.se), +46 222 36 73 (JALP), +46 222 46 26 (ENK)

**Supplementary Table S1.** Sequencing and trimming data of *Weissella* sp. strains. Coverage is calculated based on genome size determined after the assembly, see **Table 1**.

|                                       |                     | <b>85</b> | <b>92</b> | <b>142</b> | <b>AV1</b> |
|---------------------------------------|---------------------|-----------|-----------|------------|------------|
| <i>Sequencing</i>                     |                     |           |           |            |            |
| DNA Library                           | Reads passed filter | 2 354 724 | 995 989   | 1 522 075  | 2 188 909  |
|                                       | Total Mbp           | 1 413     | 598       | 913        | 1 313      |
|                                       | Coverage            | 534       | 240       | 340        | 513        |
| Mate pair library                     | Reads passed filter | -         | 1 226 160 | 1 429 182  | 1 612 465  |
|                                       | Total Mbp           | -         | 613       | 715        | 806        |
|                                       | Coverage            | -         | 232       | 287        | 300        |
| Total coverage                        |                     | 534       | 472       | 627        | 813        |
| <i>Trimming and quality filtering</i> |                     |           |           |            |            |
| DNA Library                           | Paired reads        | 1 531 549 | 846 854   | 932 023    | 1 433 933  |
|                                       | Unpaired reads      | 665 340   | 123 219   | 464 090    | 595 342    |
|                                       | Total Mbp           | 951       | 463       | 594        | 883        |
|                                       | Coverage            | 360       | 186       | 221        | 345        |
| Mate pair library                     | Paired reads        | -         | 637 683   | 765 720    | 793 512    |
|                                       | Unpaired reads      | -         | 492 074   | 531 757    | 613 272    |
|                                       | Total Mbp           | -         | 398       | 464        | 495        |
|                                       | Coverage            | -         | 160       | 173        | 193        |
| Total coverage                        |                     | 360       | 346       | 394        | 538        |

**Supplementary Table S2.** Screening of carbohydrate fermentation in *Weissella cibaria* strain 92. Carbohydrate fermentation was considered present (+) if the specific growth rate,  $\mu$ , was at least  $0.1 \text{ h}^{-1}$  and the pH decreased at least 0.2 units over 48 h of cultivation. Otherwise, no or negligible carbohydrate fermentation (-) was assumed. P - production, U - uptake, n.d. - not detected. Production and uptake are relative to the amount of product that was within the medium at the start of cultivation.

| Carbohydrate                              | Carbohydrate fermentation | Fermentation products |         |         |            |          |
|-------------------------------------------|---------------------------|-----------------------|---------|---------|------------|----------|
|                                           |                           | Lactate               | Ethanol | Acetate | Propionate | Butyrate |
| <i>1 mL cultivation – microaerophilic</i> |                           |                       |         |         |            |          |
| Glucose                                   | +                         | P                     | P       | U       | n.d.       | n.d.     |
| Laminaribiose                             | +                         | P                     | P       | P       | n.d.       | n.d.     |
| Laminaritriose                            | -                         |                       |         |         |            |          |
| Laminaritetraose                          | -                         |                       |         |         |            |          |
| Arabinose                                 | +                         | P                     | n.d.    | P       | n.d.       | n.d.     |
| Arabinobiose (A <sub>2</sub> )            | +                         | P                     | n.d.    | P       | n.d.       | P        |
| Arabinotriose (A <sub>3</sub> )           | -                         |                       |         |         |            |          |
| Arabinotetraose (A <sub>4</sub> )         | -                         |                       |         |         |            |          |
| Arabinopentose (A <sub>5</sub> )          | -                         |                       |         |         |            |          |
| <i>N</i> -Acetyl-glucosamine              | +                         | P                     | P       | P       | n.d.       | n.d.     |
| Diacetyl-chitobiose                       | -                         |                       |         |         |            |          |
| <i>75 mL cultivation – anaerobic</i>      |                           |                       |         |         |            |          |
| Glucose                                   | +                         | P                     | P       | P       | n.d.       | n.d.     |
| Arabinose                                 | +                         | P                     | n.d.    | P       | n.d.       | P        |
| Xylose                                    | +                         | P                     | n.d.    | P       | n.d.       | P        |
| Negative control                          | -                         |                       |         |         |            |          |

**Supplementary Table S3.** Primer sequences used for real-time quantitative reverse transcription-PCR (RT-qPCR). *peg* refers to protein encoding gene from annotation.

| <b>Gene_peg</b>        | <b>Forward primer</b> | <b>Reverse primer</b> |
|------------------------|-----------------------|-----------------------|
| <i>Reference genes</i> |                       |                       |
| <i>gyrA_402</i>        | TGACGACCAACAAGGGTGTA  | TAAGCGAATAACCCGGACAC  |
| <i>gyrB_403</i>        | TTGATGTCACAAAGGCGAAG  | ACAATGGACGCATGTAACGA  |
| <i>dnaG_1592</i>       | GCGTAATCTGTTTGGGCTGT  | CCGCATGAGAAGCAGTGATA  |
| <i>rpoB_730</i>        | GTCCATCAATGGAGCAAGGT  | TAAACATCATCGCGGATCAA  |
| <i>rpoC_731</i>        | TGGACACATCTTGGCACCTA  | CCTTCACGACCAGCTTCTTC  |
| <i>rpoD_7593</i>       | GATGACACAGCCAAGCAAGA  | ATTGCATACCACGACCAACA  |
| <i>ddl_1049</i>        | ATGCCATGGACAAGGAAAAG  | CTTCCGCCACAATCGTATCT  |
| <i>Target genes</i>    |                       |                       |
| <i>bgl_197</i>         | GATACGGCGTTCAAGGATGT  | AAATCGGCATCATAGCGTTC  |
| <i>bglB_302</i>        | TTGCGCATACCAAGTATCCA  | TTACGCGCTGCATAGACATC  |
| <i>bglB_303+905</i>    | TCAATTGCGGATGTGATGTT  | ATCCCACGGTGATTTGGATA  |
| <i>bglB_379</i>        | CCGTTATCAAAAGCCGTTGT  | ATGTGCTCGCGGAAATAATC  |
| <i>bglB_461</i>        | CCGTTATGCGGAGACGTTAT  | AATACCACCAGCGTTCCAAG  |
| <i>bglB_1258</i>       | TTTATGATTGGGGGCATGTT  | TGCACGTCTGAGAACCAGTC  |
| <i>bglB_1261</i>       | TCCAATGCTGCAAAACTCAG  | AATGCGGATGCCAATAACTC  |
| <i>bglB_1679</i>       | GCTGACGTTGAGGTTGTGAA  | GTAACGCAAGCCTTGTGGAT  |
| <i>bglB_2328</i>       | TGTCGACCTGATGGGTTACA  | CCCATAACGCTTCGACATTT  |
| <i>eng_661</i>         | GCAACGTTAAGCAAGCAACA  | CGCAACTTCCTTGGCTTTAG  |
| <i>gh13_853</i>        | AATTGGCGCAGTATTTTTGG  | CAGTGCTGGATTTTCCAAT   |
| <i>bglB_303</i>        | CGCAAACACGGTTGATTATG  | GTTGTAGGCGAGCCATTCAT  |

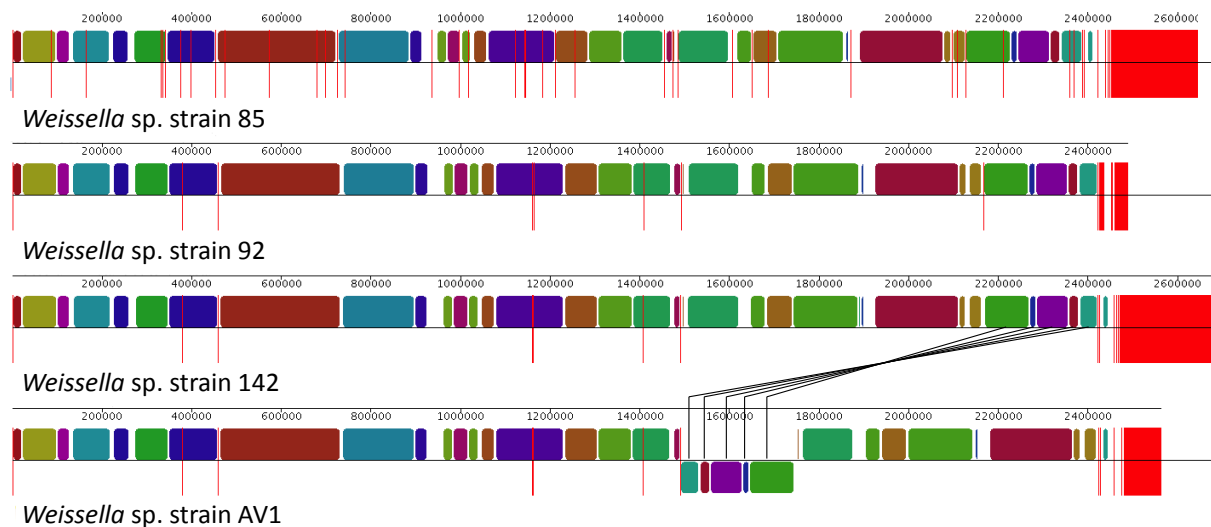

**Supplementary Fig. S1.** Alignments of the assembled genomes. The border of each contig is marked by a red line. Coloured blocks are regions aligned to regions in the other genomes, marked in the same colour. Blocks under the line indicate that the alignment is made in the reverse direction relative to the first genome (*Weissella* sp. strain 85). For a clearer picture, only major rearrangements of aligned regions (> 10.000 bp) are marked by connecting lines.

|                              | New <i>Weissella</i> sp. strains |       |       |      | <i>Weissella cibaria</i> |      |            |      |      |       |      |      | <i>Weissella confusa</i> |           |        |
|------------------------------|----------------------------------|-------|-------|------|--------------------------|------|------------|------|------|-------|------|------|--------------------------|-----------|--------|
|                              | 85                               | AV1   | 142   | FBL5 | AB3b                     | CMU  | KACC 11862 | CMS3 | CMS2 | ff3PR | CH2  | MG1  | LBAE C39-2               | DSM 20196 | MBF8-1 |
| <i>W. sp.</i> strain 92      | 100.0                            | 100.0 | 100.0 | 99.9 | 99.9                     | 99.8 | 99.8       | 99.8 | 99.8 | 99.7  | 99.7 | 99.6 | 88.0                     | 87.4      | 86.6   |
| <i>W. sp.</i> strain 85      | 100.0                            | 100.0 | 99.9  | 99.9 | 99.8                     | 99.8 | 99.8       | 99.8 | 99.7 | 99.8  | 99.6 | 88.0 | 87.3                     | 86.6      |        |
| <i>W. sp.</i> strain AV1     | 100.0                            | 99.9  | 99.9  | 99.8 | 99.8                     | 99.8 | 99.8       | 99.8 | 99.7 | 99.8  | 99.6 | 88.0 | 87.1                     | 86.7      |        |
| <i>W. sp.</i> strain 142     | 99.9                             | 99.9  | 99.8  | 99.8 | 99.8                     | 99.8 | 99.8       | 99.8 | 99.8 | 99.8  | 99.7 | 88.0 | 87.1                     | 86.7      |        |
| <i>W. cibaria</i> FBL5       | 99.9                             | 99.9  | 99.9  | 99.9 | 99.9                     | 99.9 | 99.9       | 99.9 | 99.7 | 99.7  | 99.4 | 88.7 | 87.9                     | 88.5      |        |
| <i>W. cibaria</i> AB3b       | 99.7                             | 99.7  | 99.7  | 99.7 | 99.7                     | 99.7 | 99.7       | 99.7 | 99.9 | 99.8  | 99.9 | 87.3 | 87.3                     | 87.1      |        |
| <i>W. cibaria</i> CMU        | 100.0                            | 100.0 | 100.0 | 99.8 | 99.8                     | 99.8 | 99.8       | 99.8 | 99.8 | 99.8  | 99.8 | 86.4 | 85.3                     | 85.8      |        |
| <i>W. cibaria</i> KACC 11862 | 100.0                            | 100.0 | 100.0 | 99.9 | 99.9                     | 99.9 | 99.9       | 99.9 | 99.9 | 99.9  | 99.9 | 86.3 | 85.3                     | 86.0      |        |
| <i>W. cibaria</i> CMS3       | 100.0                            | 99.8  | 99.8  | 99.8 | 99.8                     | 99.8 | 99.8       | 99.8 | 99.8 | 99.8  | 99.8 | 86.4 | 85.7                     | 85.8      |        |
| <i>W. cibaria</i> CMS2       | 99.8                             | 99.8  | 99.8  | 99.8 | 99.8                     | 99.8 | 99.8       | 99.8 | 99.8 | 99.8  | 99.8 | 86.4 | 85.3                     | 86.0      |        |
| <i>W. cibaria</i> ff3PR      | 99.9                             | 99.9  | 100.0 | 87.4 | 87.9                     | 86.1 | 87.4       | 87.9 | 86.1 | 87.1  | 87.1 | 88.6 | 87.5                     | 87.1      |        |
| <i>W. cibaria</i> CH2        | 99.9                             | 99.9  | 87.1  | 87.5 | 86.8                     | 87.1 | 87.1       | 87.1 | 87.1 | 87.1  | 87.1 | 88.6 | 87.5                     | 87.1      |        |
| <i>W. cibaria</i> MG1        | 87.1                             | 87.5  | 86.8  | 87.1 | 87.5                     | 86.8 | 87.1       | 87.5 | 86.8 | 87.1  | 87.5 | 87.1 | 87.5                     | 86.8      |        |
| <i>W. confusa</i> LBAE C39-2 | 99.9                             | 99.9  | 99.9  | 99.9 | 99.9                     | 99.9 | 99.9       | 99.9 | 99.9 | 99.9  | 99.9 | 99.9 | 99.9                     | 99.9      |        |
| <i>W. confusa</i> DSM 20196  | 99.4                             | 99.4  | 99.4  | 99.4 | 99.4                     | 99.4 | 99.4       | 99.4 | 99.4 | 99.4  | 99.4 | 99.4 | 99.4                     | 99.4      |        |

  

|                                        | <i>Weissella</i> species |         |                        |           |       |              |      |        |          |             |       |              |           |
|----------------------------------------|--------------------------|---------|------------------------|-----------|-------|--------------|------|--------|----------|-------------|-------|--------------|-----------|
|                                        | sp. DD23                 | confusa | parames-<br>enteroides | hellenica | bombi | jogaegotgali | ceti | oryzae | kandleri | viridescens | minor | halotolerans | koreensis |
| <i>W. cibaria</i> CH2                  | 99.8                     | 87.5    | 72.1                   | 71.8      | 71.4  | 69.3         | 65.3 | 64.9   | 63.7     | 63.7        | 62.5  | 62.4         | 60.6      |
| <i>W. sp.</i> DD23                     | 88.3                     | 74.2    | 74.1                   | 71.9      | 68.1  | 70.5         | 68.1 | 58.8   | 67.1     | 59.4        | 65.7  | 63.8         | 63.8      |
| <i>W. confusa</i> DSM 20196            | 72.9                     | 69.2    | 76.6                   | 71.4      | 66.3  | 68.8         | 65.1 | 66.8   | 61.3     | 66.6        | 62.7  | 62.8         | 62.8      |
| <i>W. paramesenteroides</i> ATCC 33313 | 81.3                     | 83.6    | 87.7                   | 64.5      | 60.2  | 57.0         | 60.4 | 62.2   | 62.7     | 62.7        | 63.1  | 62.0         | 62.0      |
| <i>W. hellenica</i> R-53116            | 92.5                     | 84.7    | 62.6                   | 62.4      | 68.8  | 62.6         | 60.3 | 60.3   | 61.3     | 61.3        | 61.3  | 61.3         | 61.3      |
| <i>W. bombi</i> R-53094                | 82.0                     | 65.8    | 67.5                   | 61.4      | 67.2  | 67.6         | 65.2 | 67.6   | 65.2     | 67.6        | 65.2  | 64.3         | 64.3      |
| <i>W. jogaegotgali</i> FOL01           | 54.4                     | 59.3    | 56.5                   | 56.6      | 65.2  | 57.7         | 59.8 | 59.8   | 59.8     | 59.8        | 59.8  | 59.8         | 59.8      |
| <i>W. ceti</i> WS105                   | 64.9                     | 66.8    | 72.4                   | 64.9      | 58.4  | 63.6         | 63.6 | 63.6   | 63.6     | 63.6        | 63.6  | 63.6         | 63.6      |
| <i>W. oryzae</i> SG25T                 | 64.6                     | 59.3    | 61.7                   | 59.3      | 61.7  | 59.3         | 61.7 | 59.3   | 61.7     | 59.3        | 61.7  | 59.3         | 61.7      |
| <i>W. kandleri</i> DSM 20593           | 59.2                     | 61.8    | 56.8                   | 56.8      | 56.8  | 56.8         | 56.8 | 56.8   | 56.8     | 56.8        | 56.8  | 56.8         | 56.8      |
| <i>W. viridescens</i> DSM 20410        | 78.6                     | 65.1    | 56.0                   | 56.0      | 56.0  | 56.0         | 56.0 | 56.0   | 56.0     | 56.0        | 56.0  | 56.0         | 56.0      |
| <i>W. minor</i> DSM 20014              | 67.8                     | 59.9    | 59.9                   | 59.9      | 59.9  | 59.9         | 59.9 | 59.9   | 59.9     | 59.9        | 59.9  | 59.9         | 59.9      |
| <i>W. halotolerans</i> DSM 20190       | 57.3                     | 57.3    | 57.3                   | 57.3      | 57.3  | 57.3         | 57.3 | 57.3   | 57.3     | 57.3        | 57.3  | 57.3         | 57.3      |

**Supplementary Fig. S2.** Sequence identity in percentage of bidirectional gene pairs from pairwise comparison of strains within *Weissella*.
